# Supplementary material for: Intratumor Bacterial Presence and Serum Amyloid A in Colorectal Cancer
Source: Research Square preprint supplement (doi:10.21203/rs.3.rs-403105/v1), 2021-04-13
Supplement: Supplementary file 1 [file 27639b2b40da90fd0cb90d02.pdf]

## Supplementary Material

### Supplementary Figures

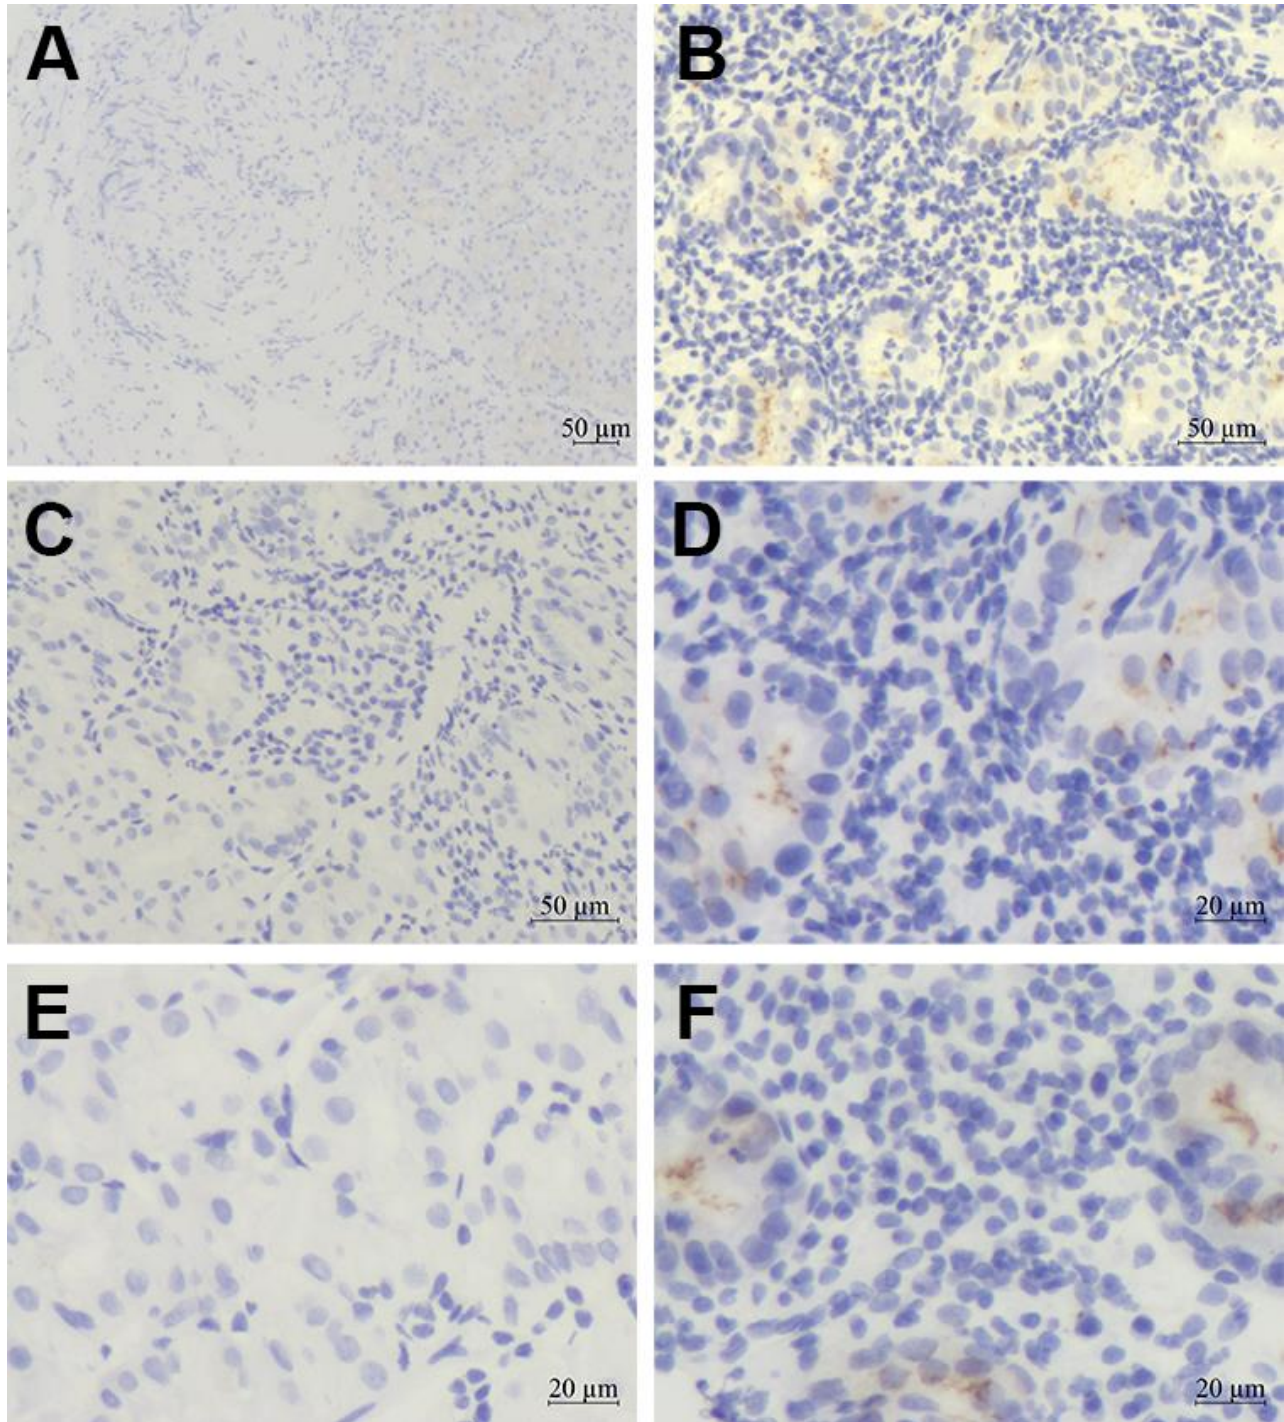

**Supplementary Figure S1.** Negative (A, C, E) and positive (B, D, F) controls for the anti-*H. pylori* antibody, using human gastritis tissue.



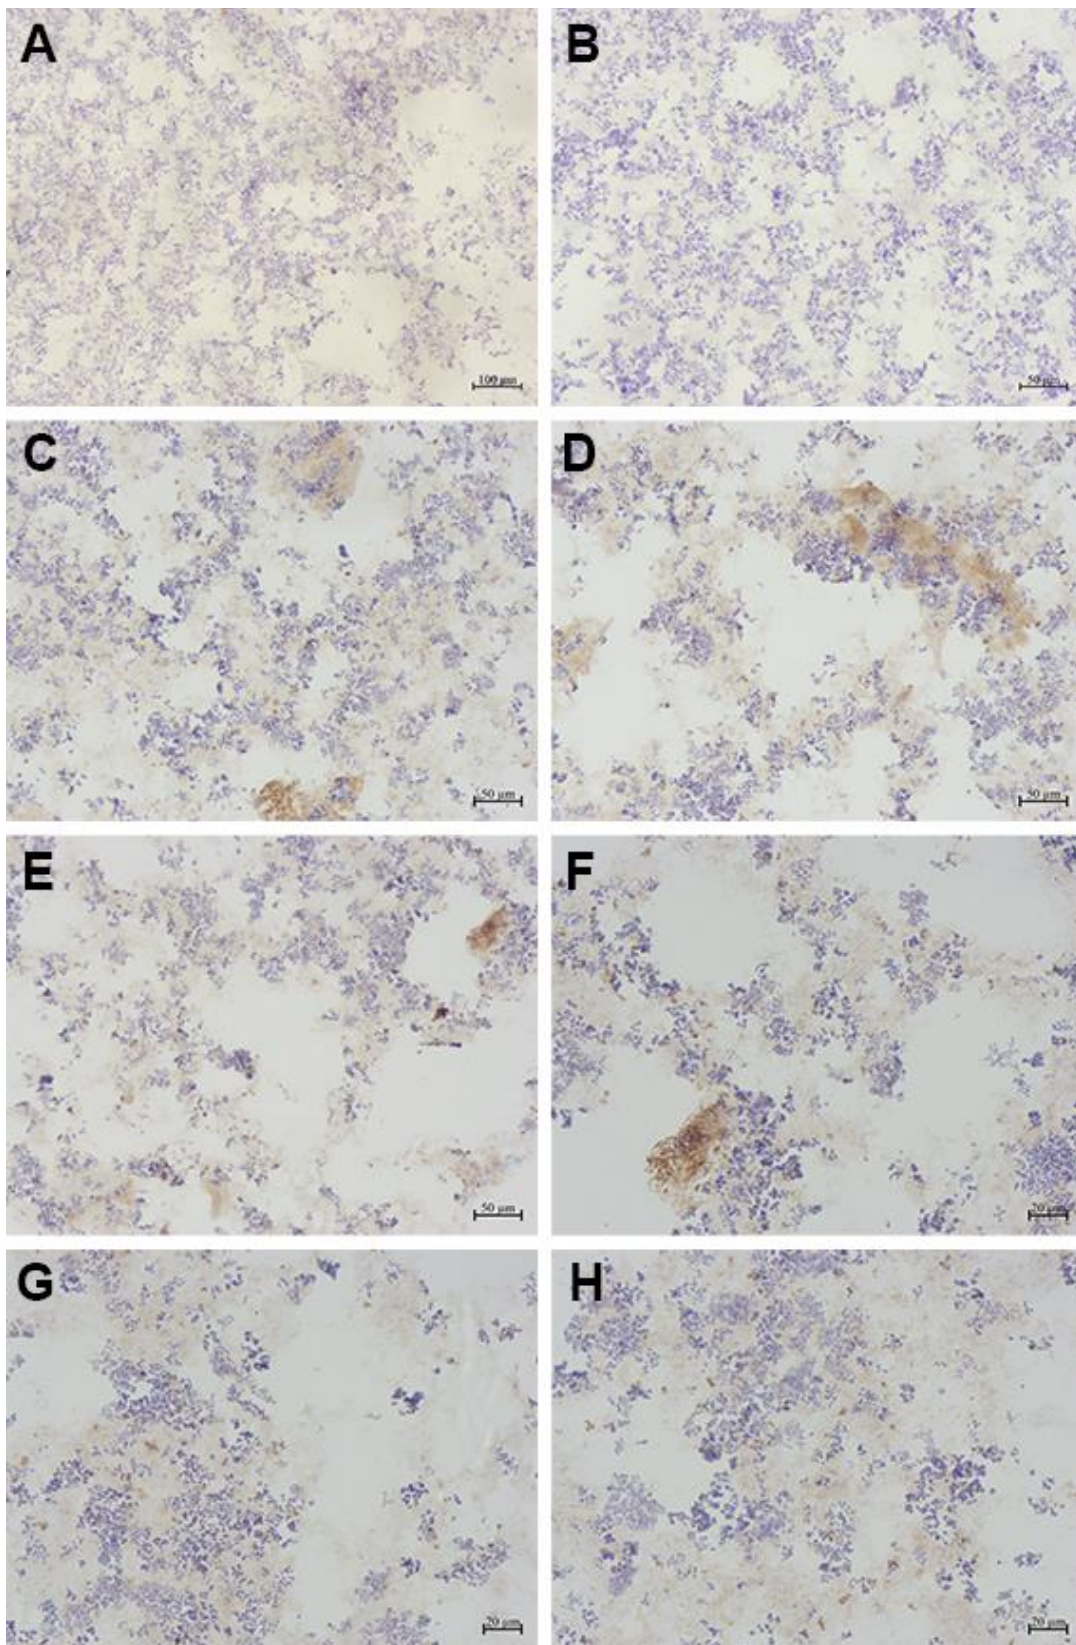

**Supplementary Figure S2.** Negative (A–B) and positive (C–H) controls for the anti-*E. coli* antibody, using healthy platelet poor plasma (PPP) exposed to an *E. coli* colony.



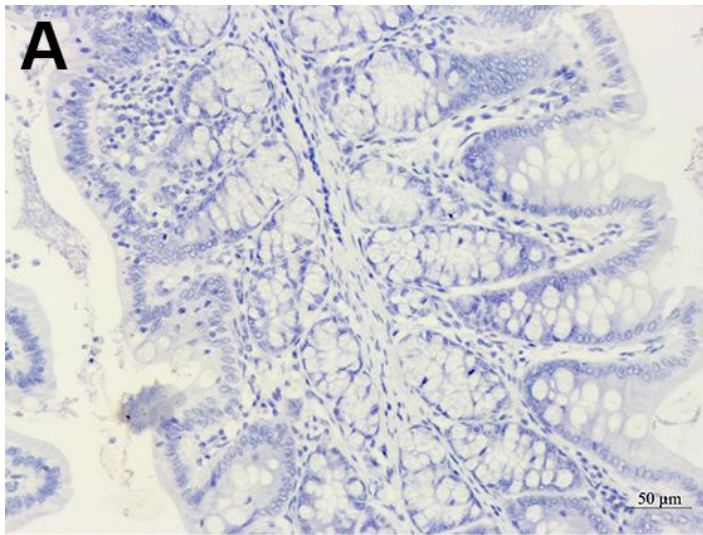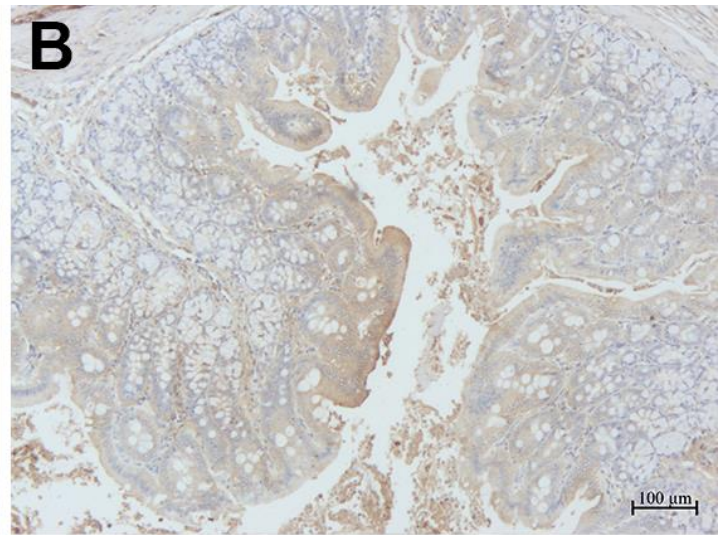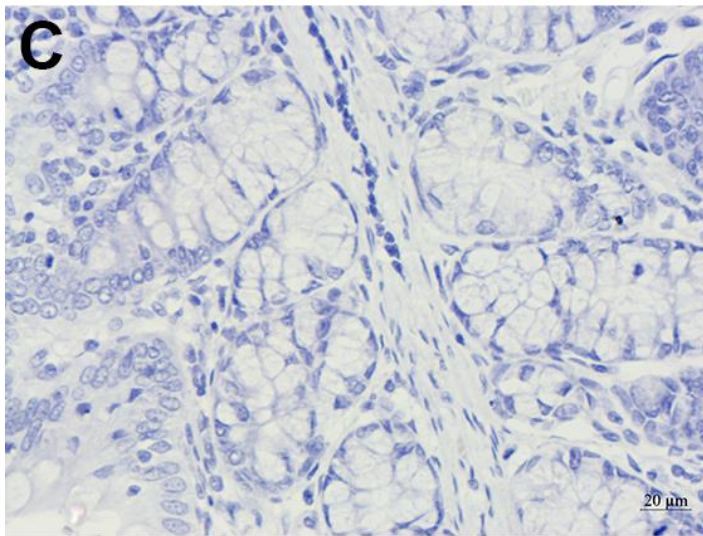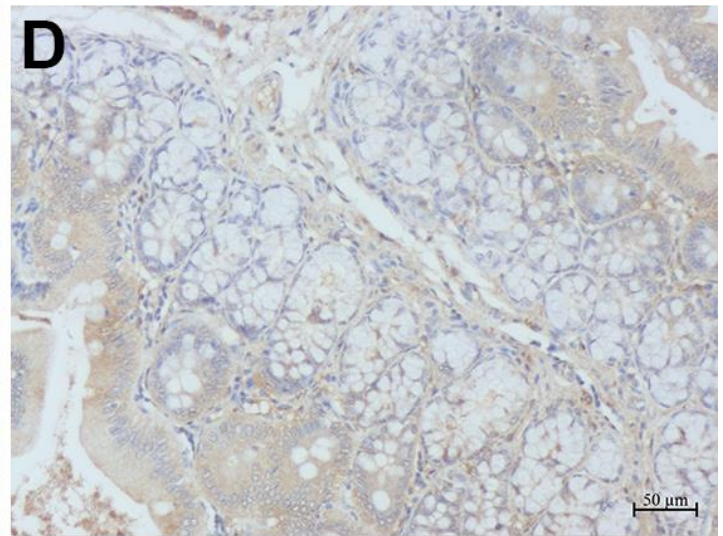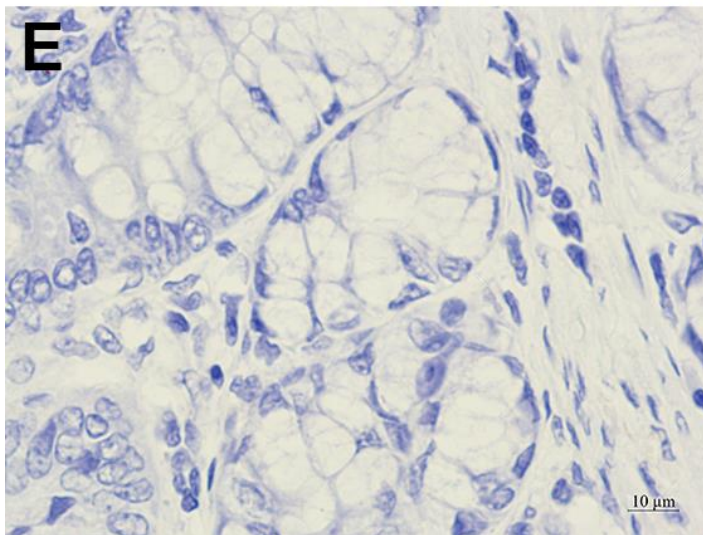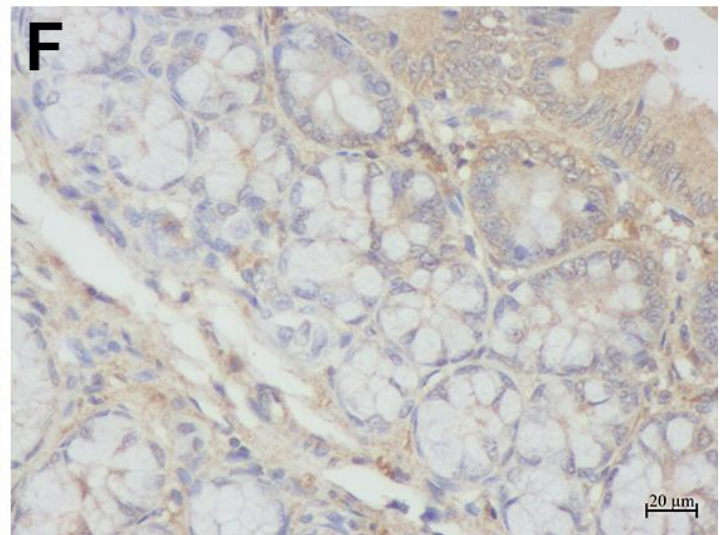

**Supplementary Figure S3.** Negative (A, C, E) and positive (B, D, F) controls for the anti-*E. coli* LPS antibody, using rat intestinal tissue.



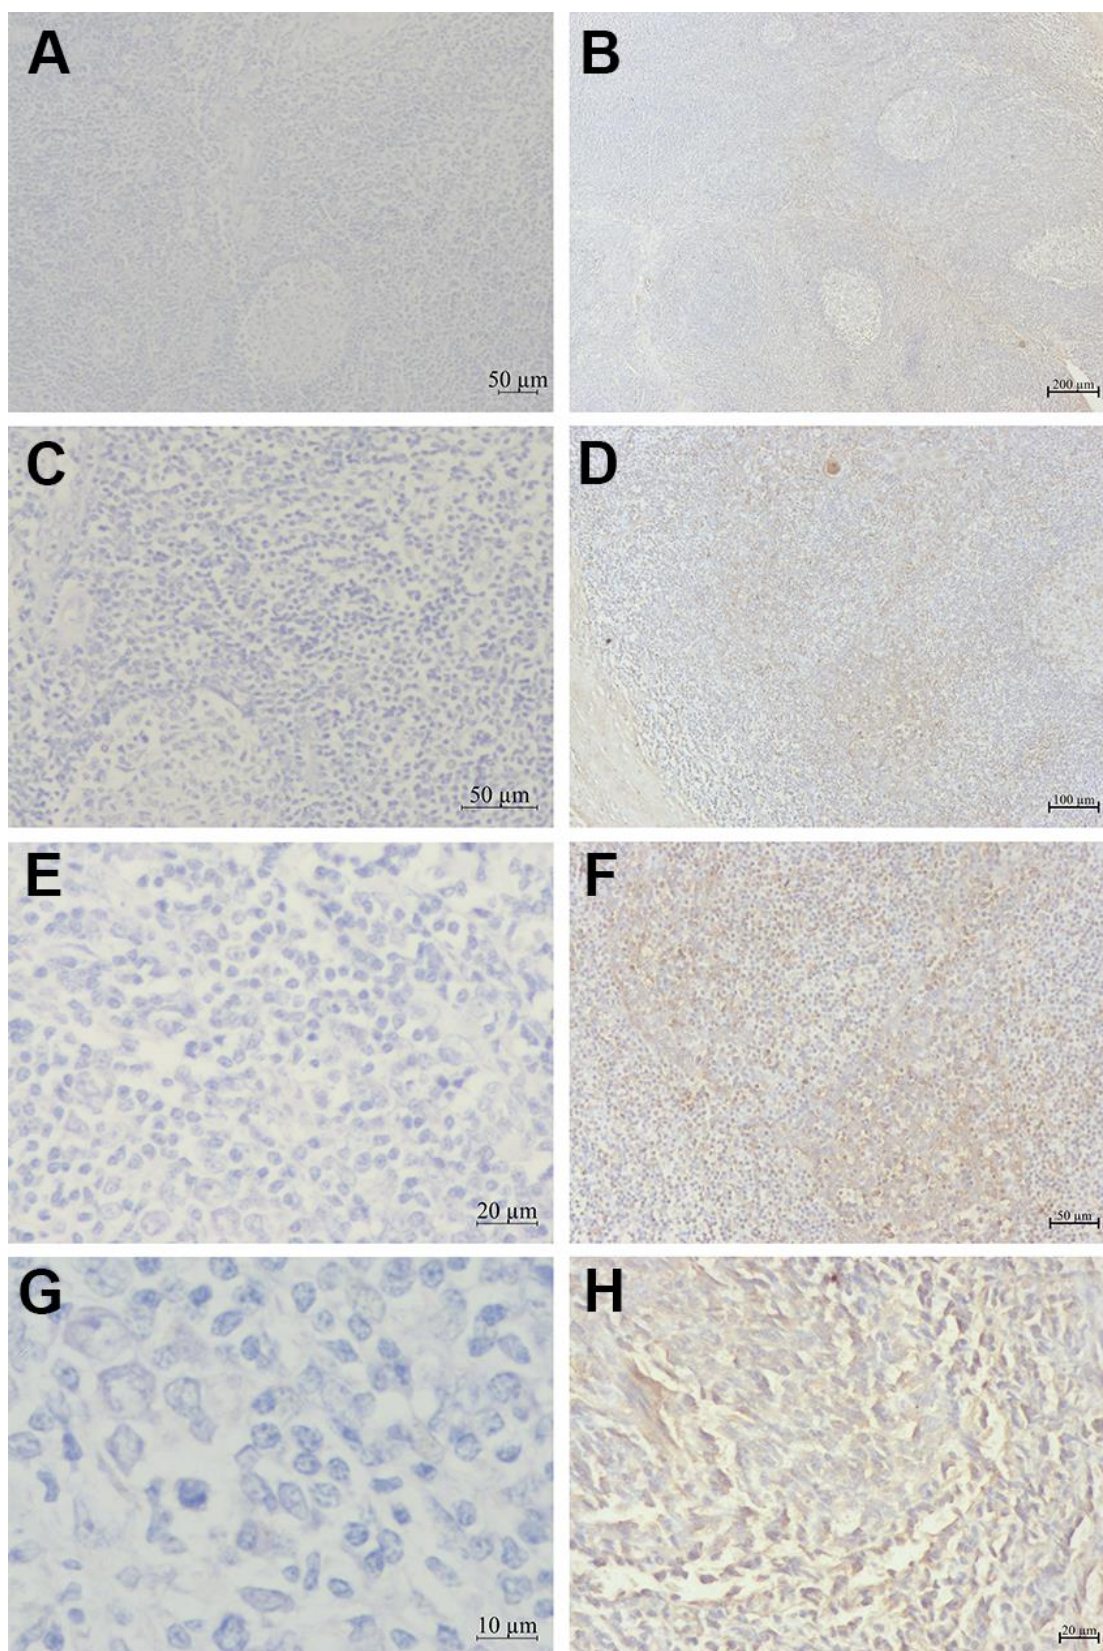

**Supplementary Figure S4.** Negative (A, C, E, G) and positive (B, D, F, H) controls for the anti-SAA antibody, using human tonsil tissue.



**A**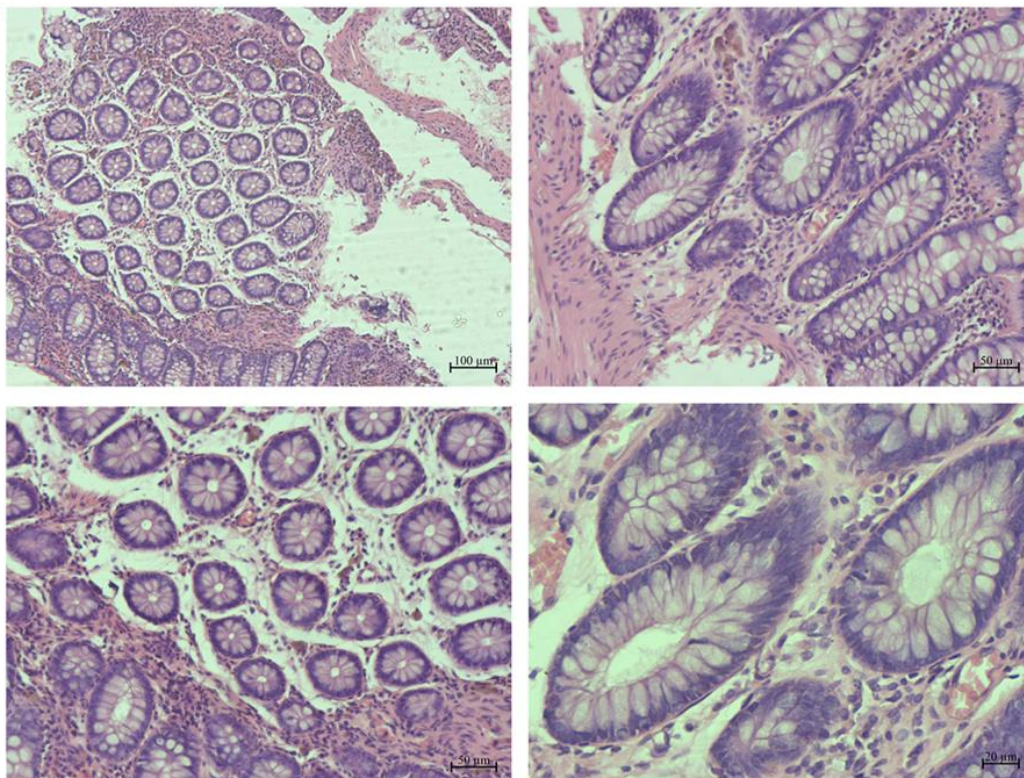**B**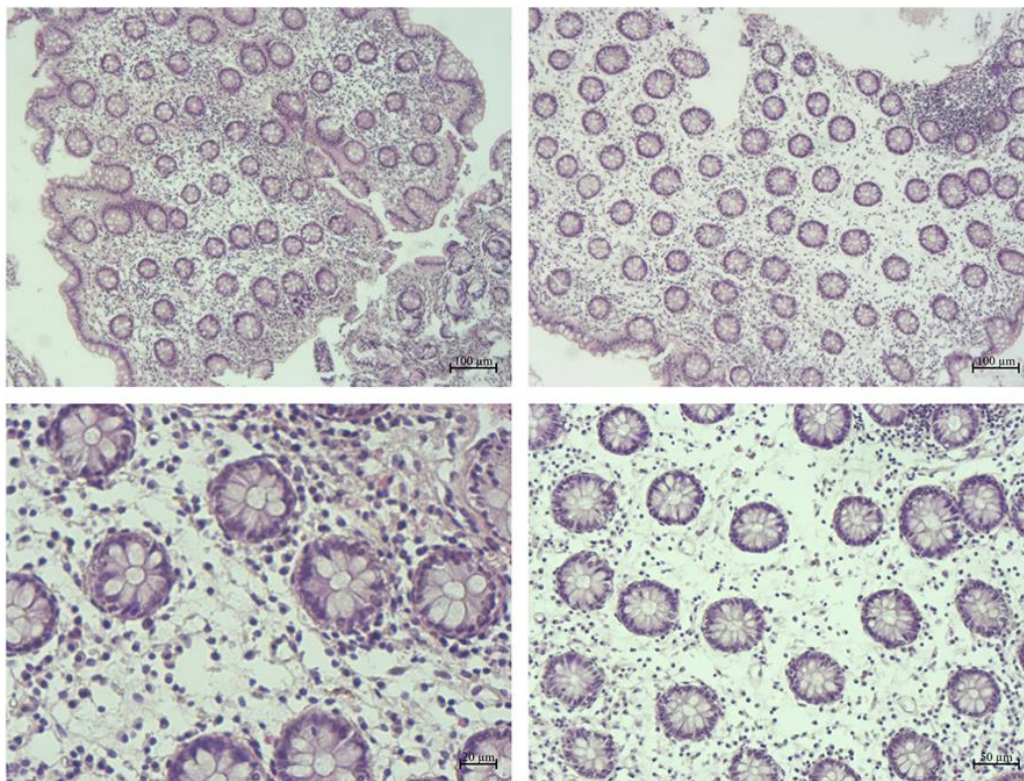

**Supplementary Figure S5.** Healthy colorectal tissue biopsies stained with haematoxylin and eosin (H&E) for morphological and structural analysis (A and B represent respective healthy colorectal tissue biopsy samples).



**A**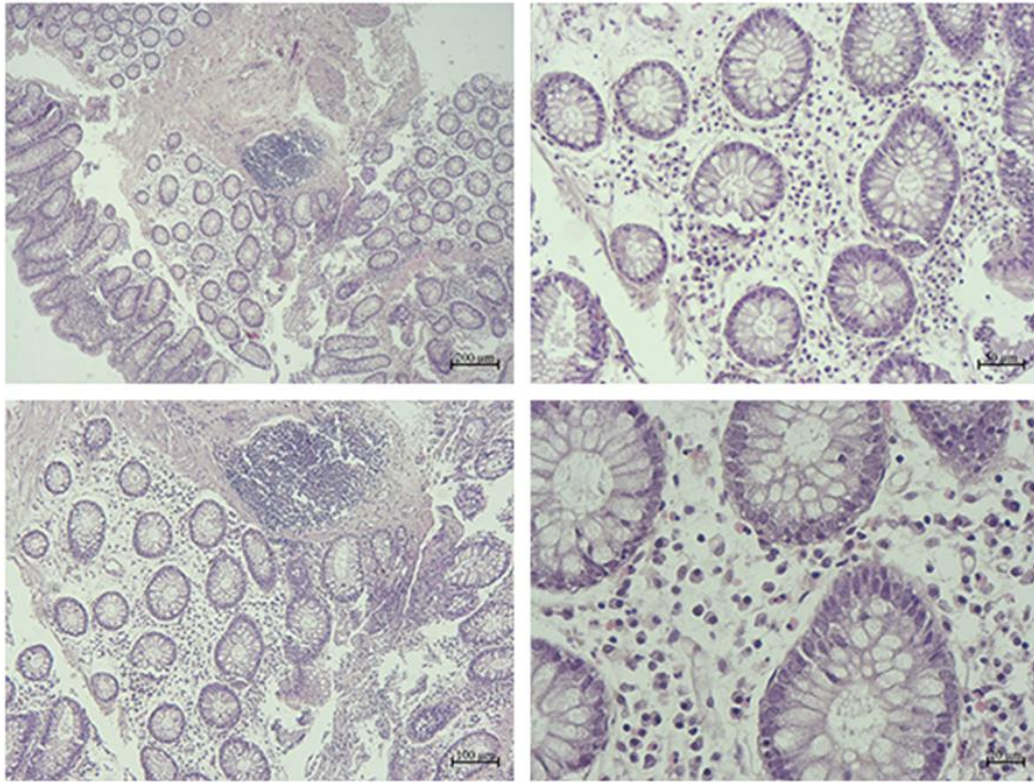**B**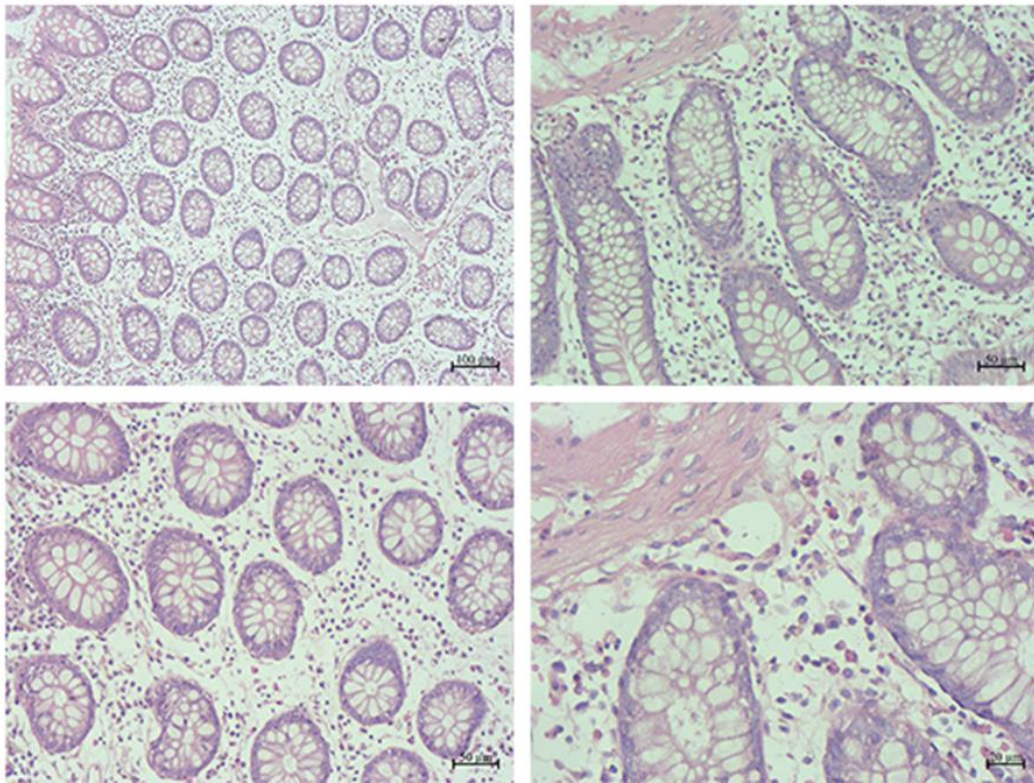

**Supplementary Figure S6.** Healthy colorectal tissue biopsies stained with haematoxylin and eosin (H&E) for morphological and structural analysis (A and B represent respective healthy colorectal tissue biopsy samples).



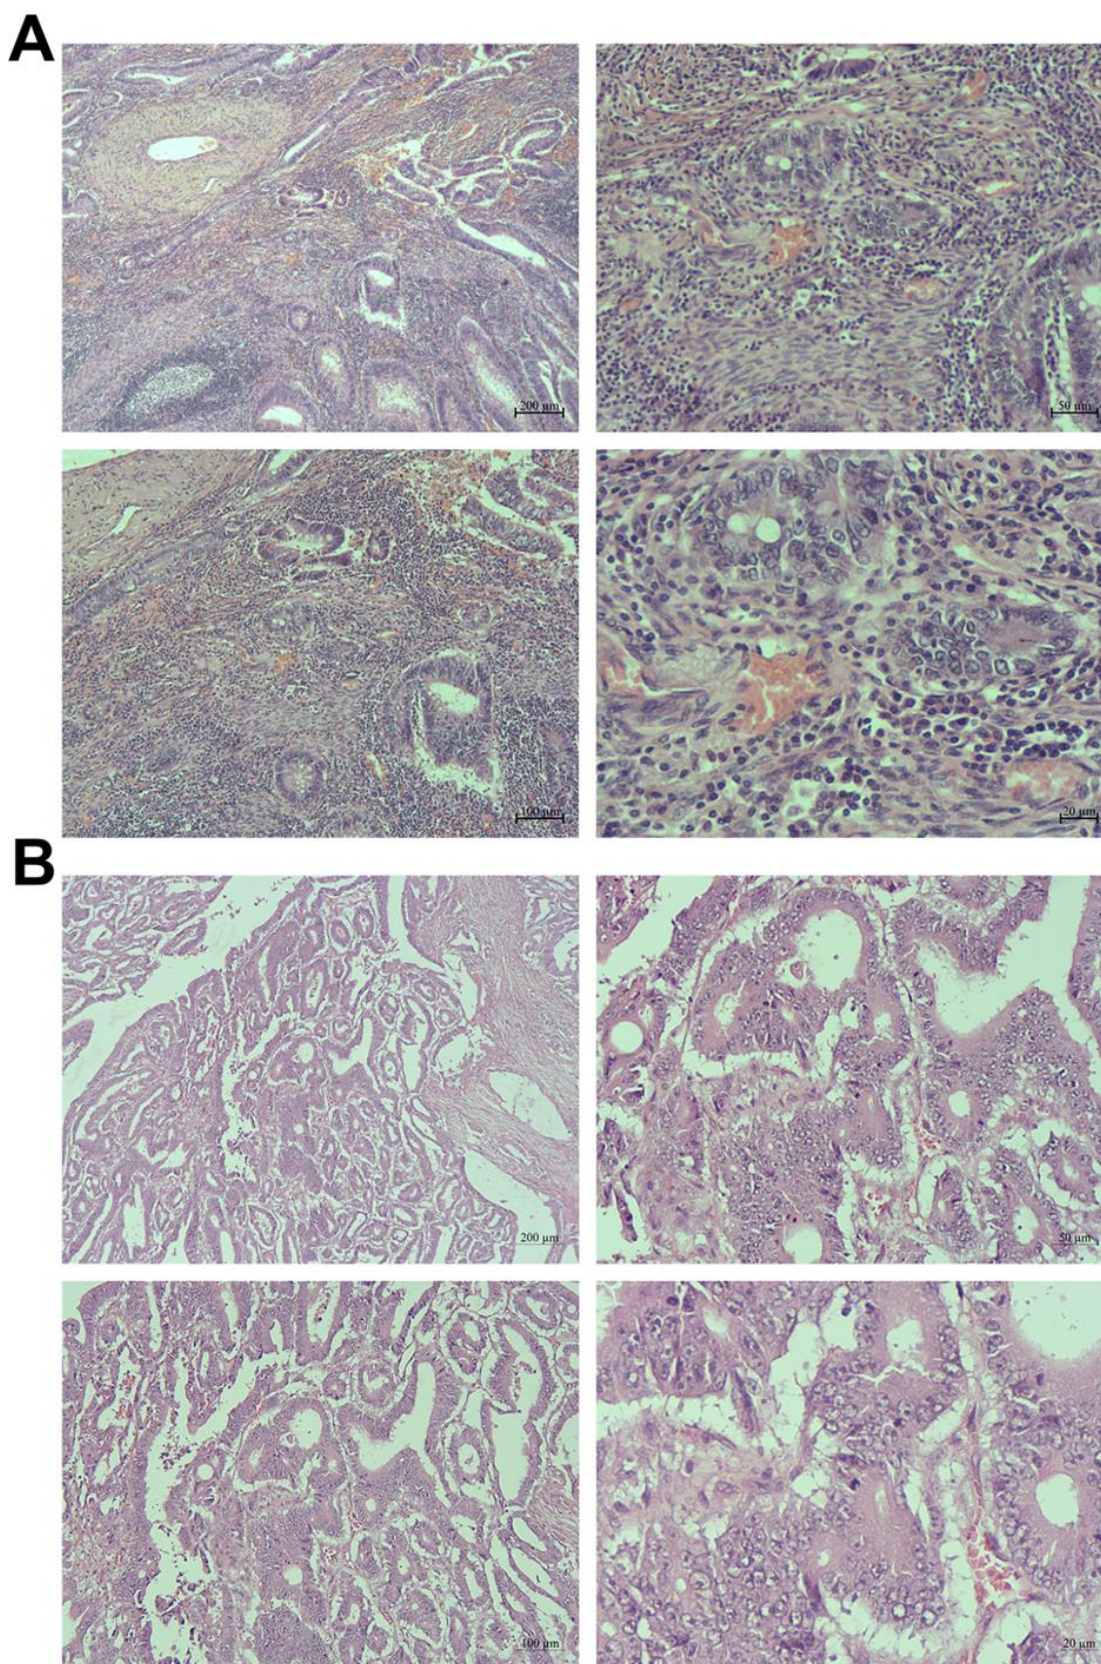

**Supplementary Figure S7.** Colorectal cancer (CRC) tumor tissues stained with haematoxylin and eosin (H&E) for morphological and structural analysis (A and B represent respective CRC tumor tissue samples).



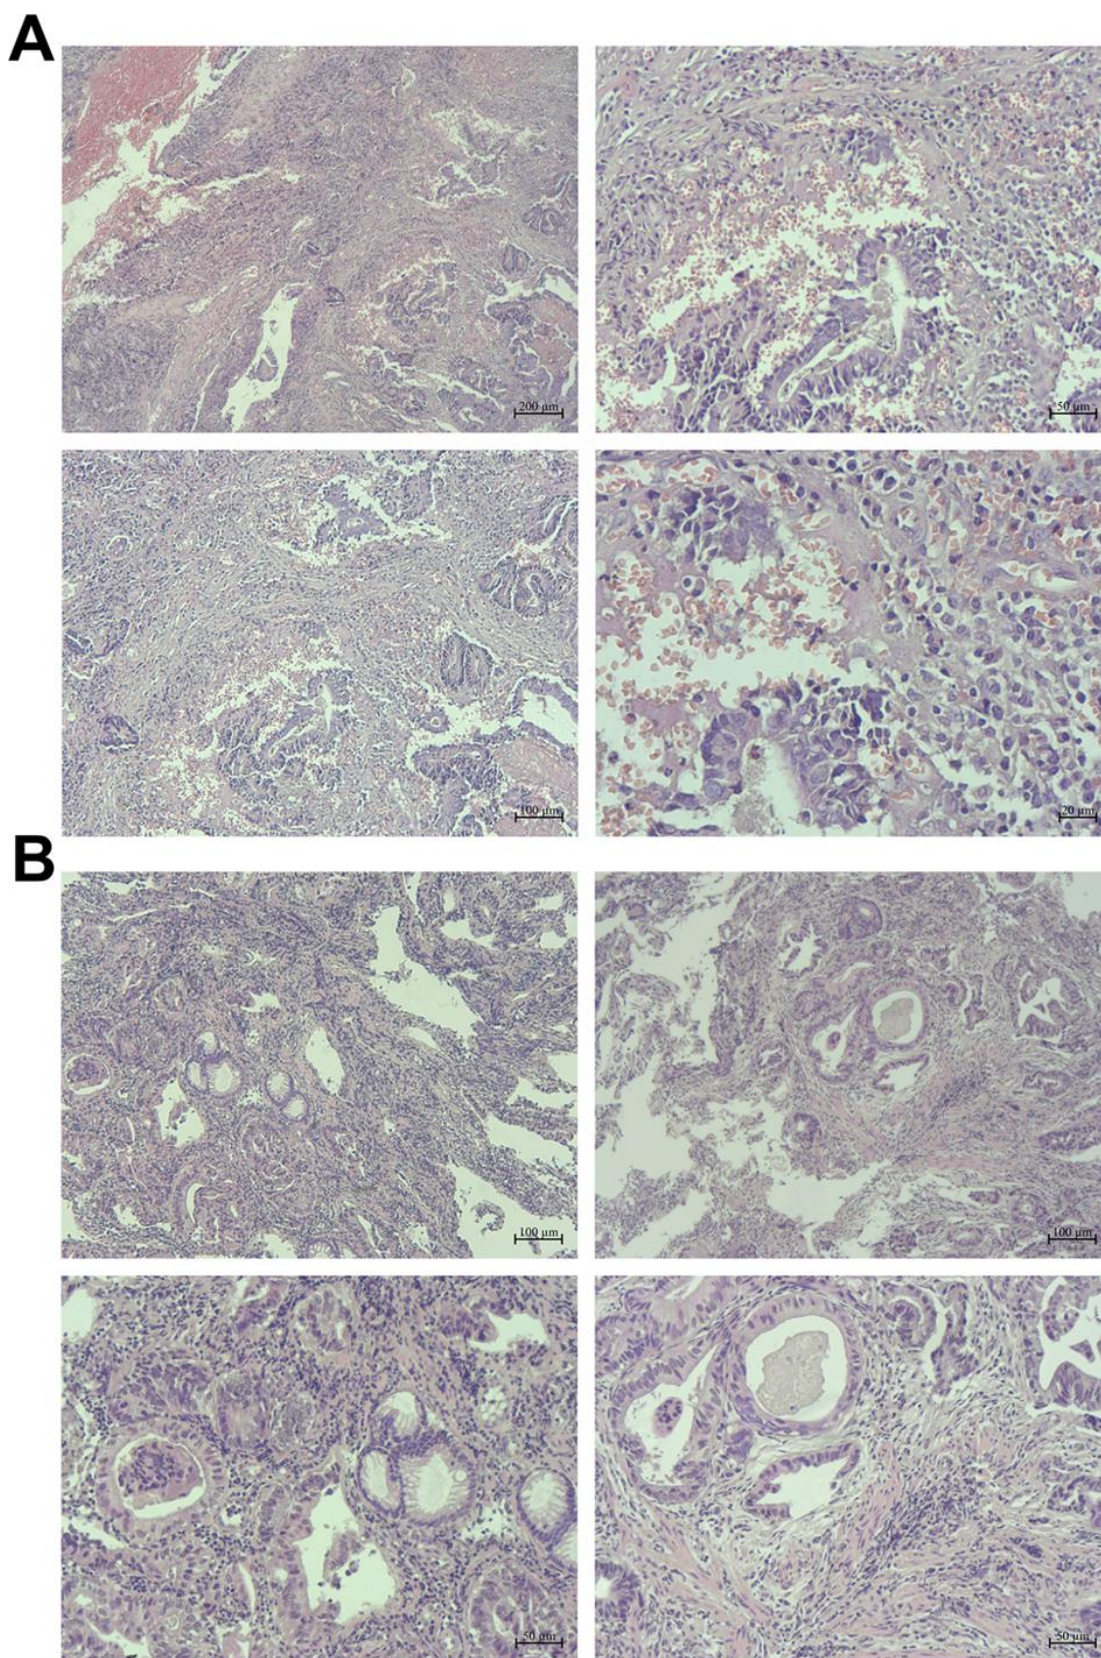

**Supplementary Figure S8.** Colorectal cancer (CRC) tumor tissues stained with haematoxylin and eosin (H&E) for morphological and structural analysis (A and B represent respective CRC tumor tissue samples).



**A**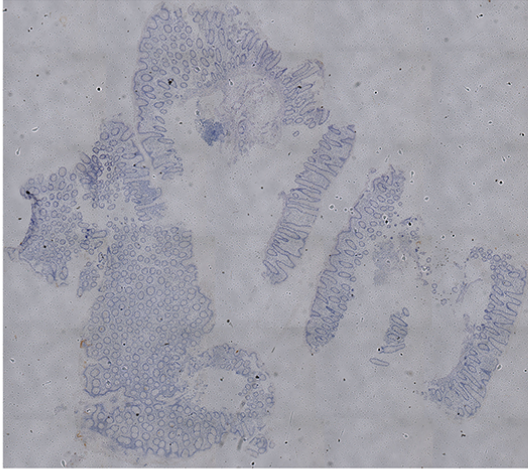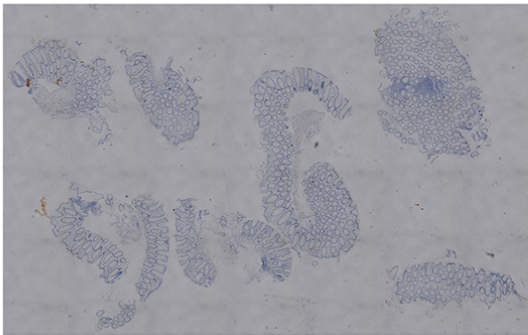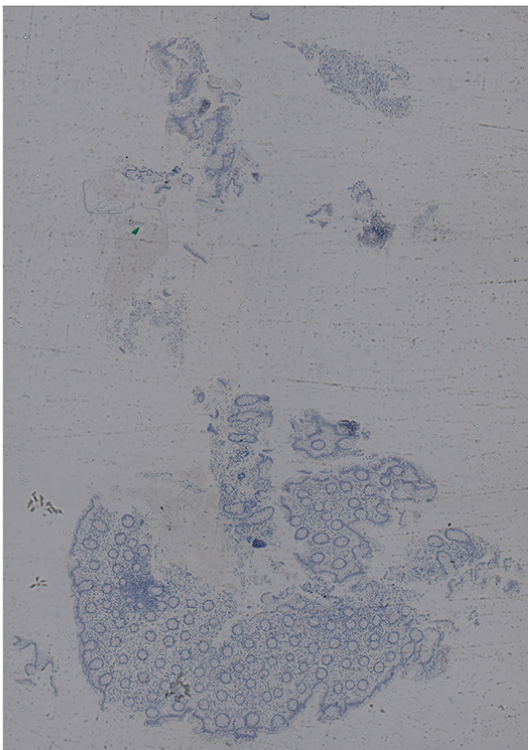**B**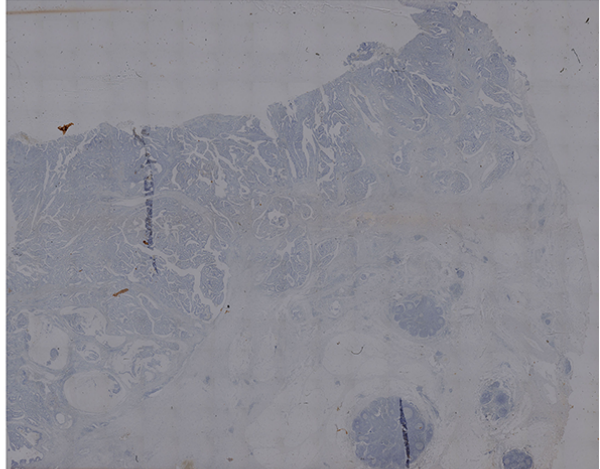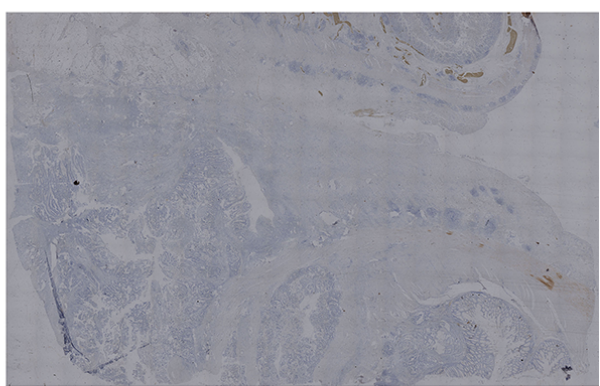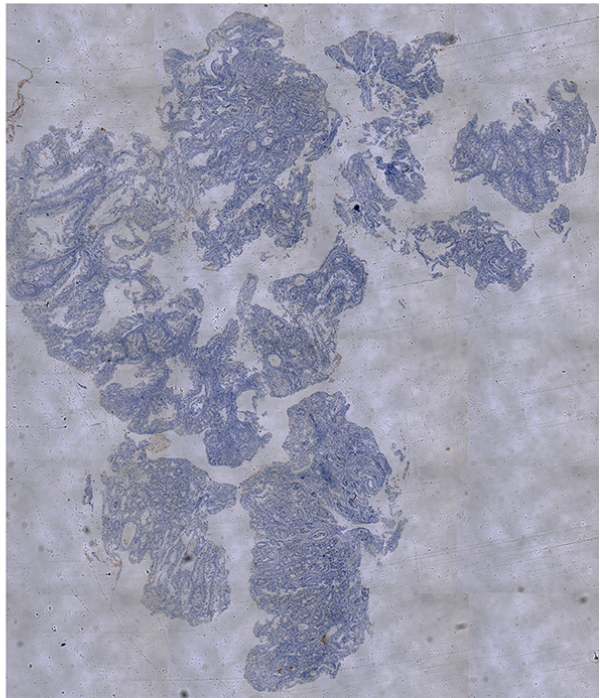

**Supplementary Figure S9.** Representative stitched tile images of **a)** healthy colorectal tissue biopsies and **b)** colorectal cancer (CRC) tumor tissues stained with anti-*H. pylori* antibody. The brightness and contrast of the images were adjusted in Adobe Photoshop CS6.



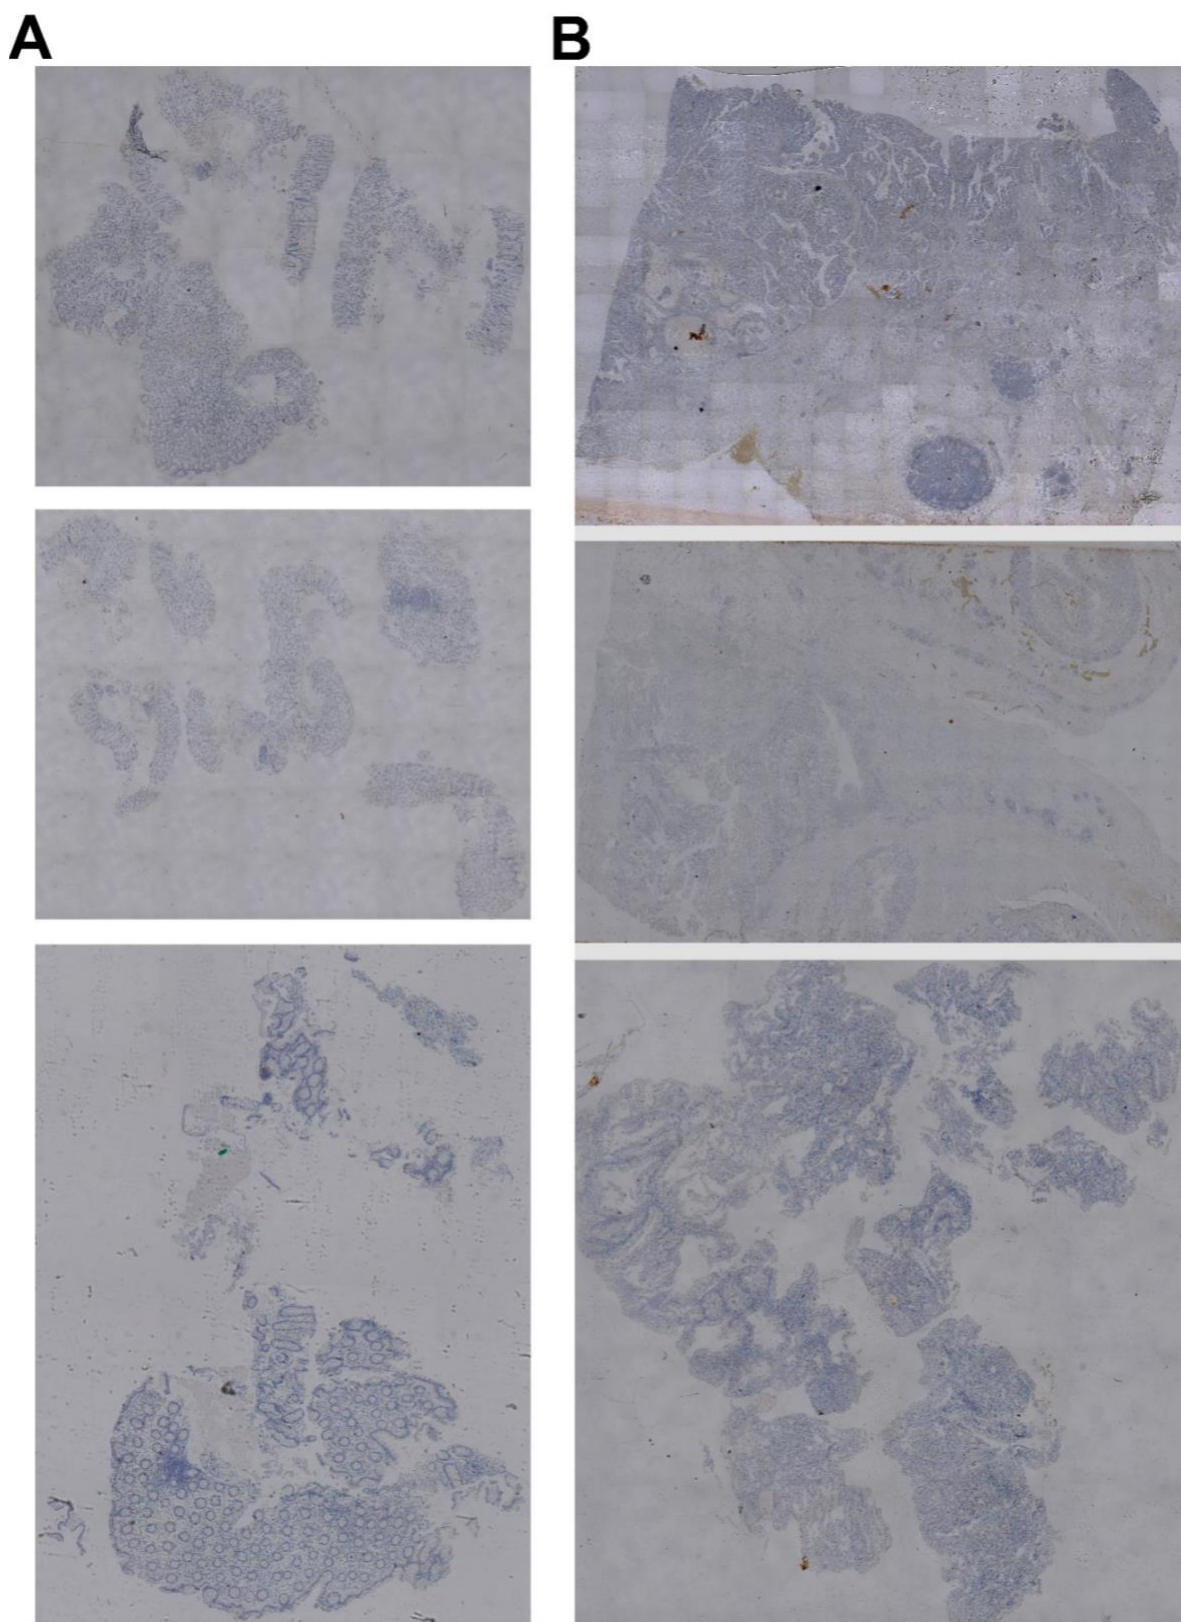

**Supplementary Figure S10.** Representative stitched tile images of **a)** healthy colorectal tissue biopsies and **b)** colorectal cancer (CRC) tumor tissues stained with anti-*E. coli* antibody. The brightness and contrast of the images were adjusted in Adobe Photoshop CS6.



**A**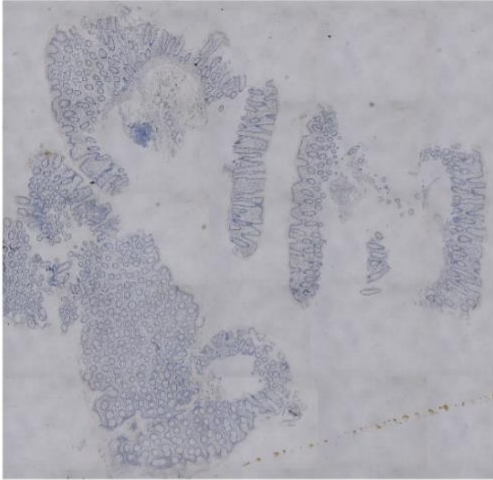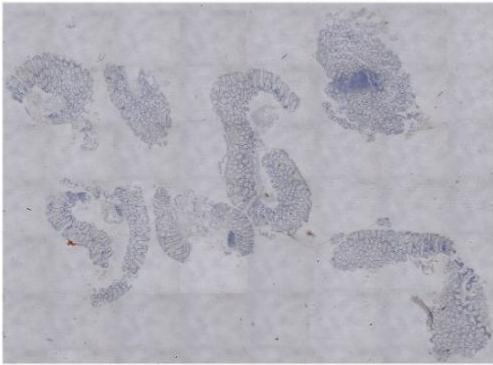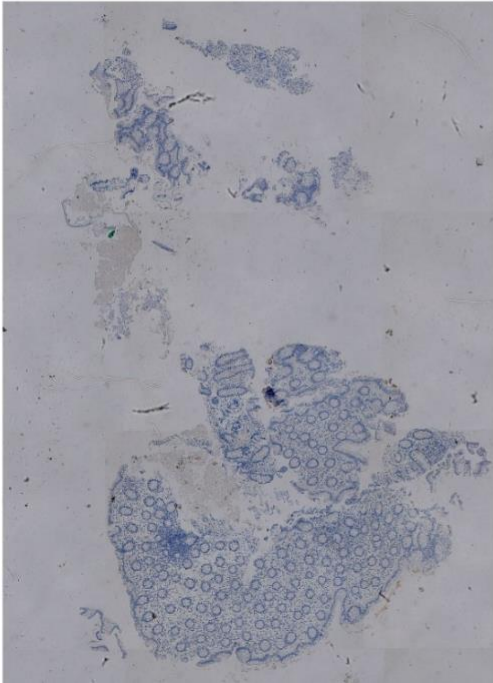**B**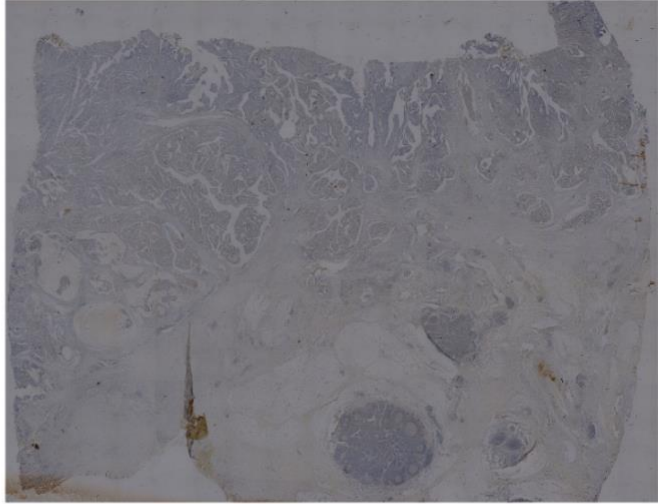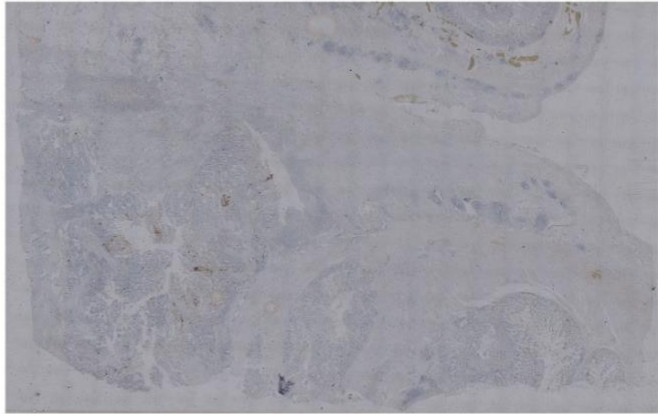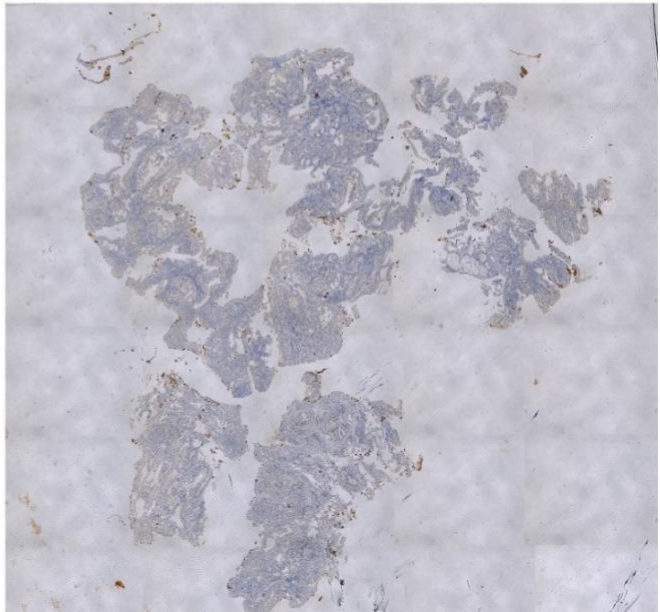

**Supplementary Figure S11.** Representative stitched tile images of **a)** healthy colorectal tissue biopsies and **b)** colorectal cancer (CRC) tumor tissues stained with anti-*E. coli* LPS antibody. The brightness and contrast of the images were adjusted in Adobe Photoshop CS6.



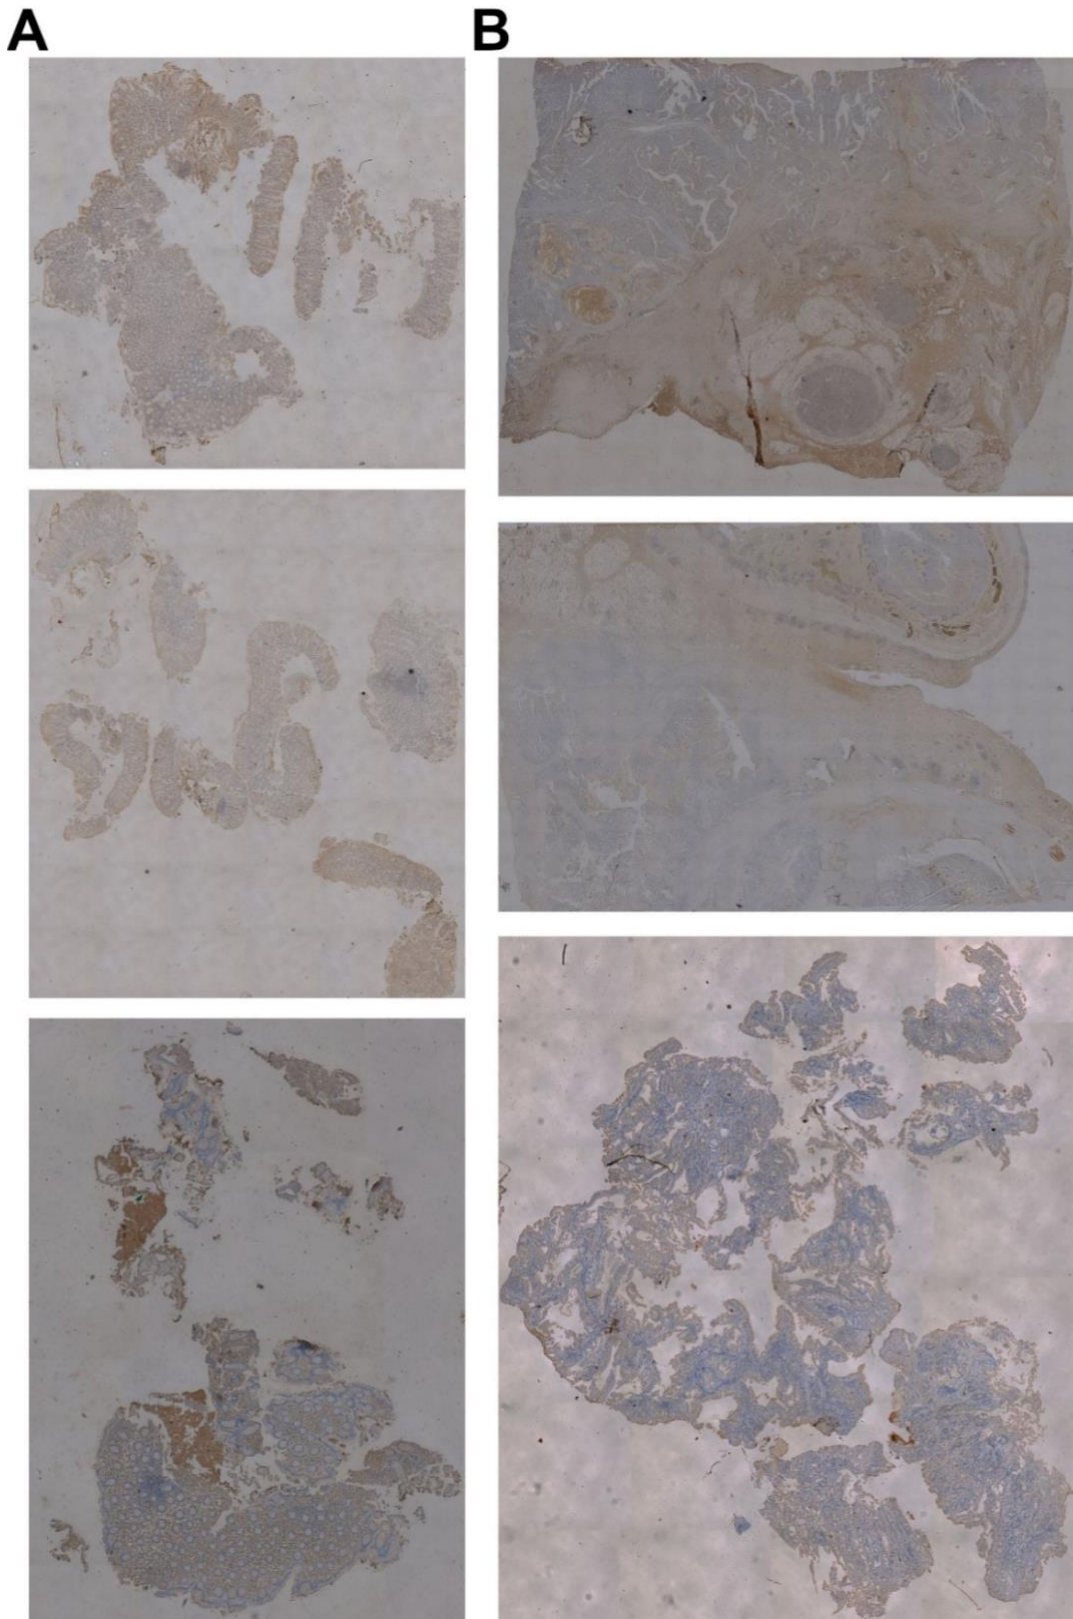

**Supplementary Figure S12.** Representative stitched tile images of **a)** healthy colorectal tissue biopsies and **b)** colorectal cancer (CRC) tumor tissues stained with anti-SAA antibody. The brightness and contrast of the images were adjusted in Adobe Photoshop CS6.



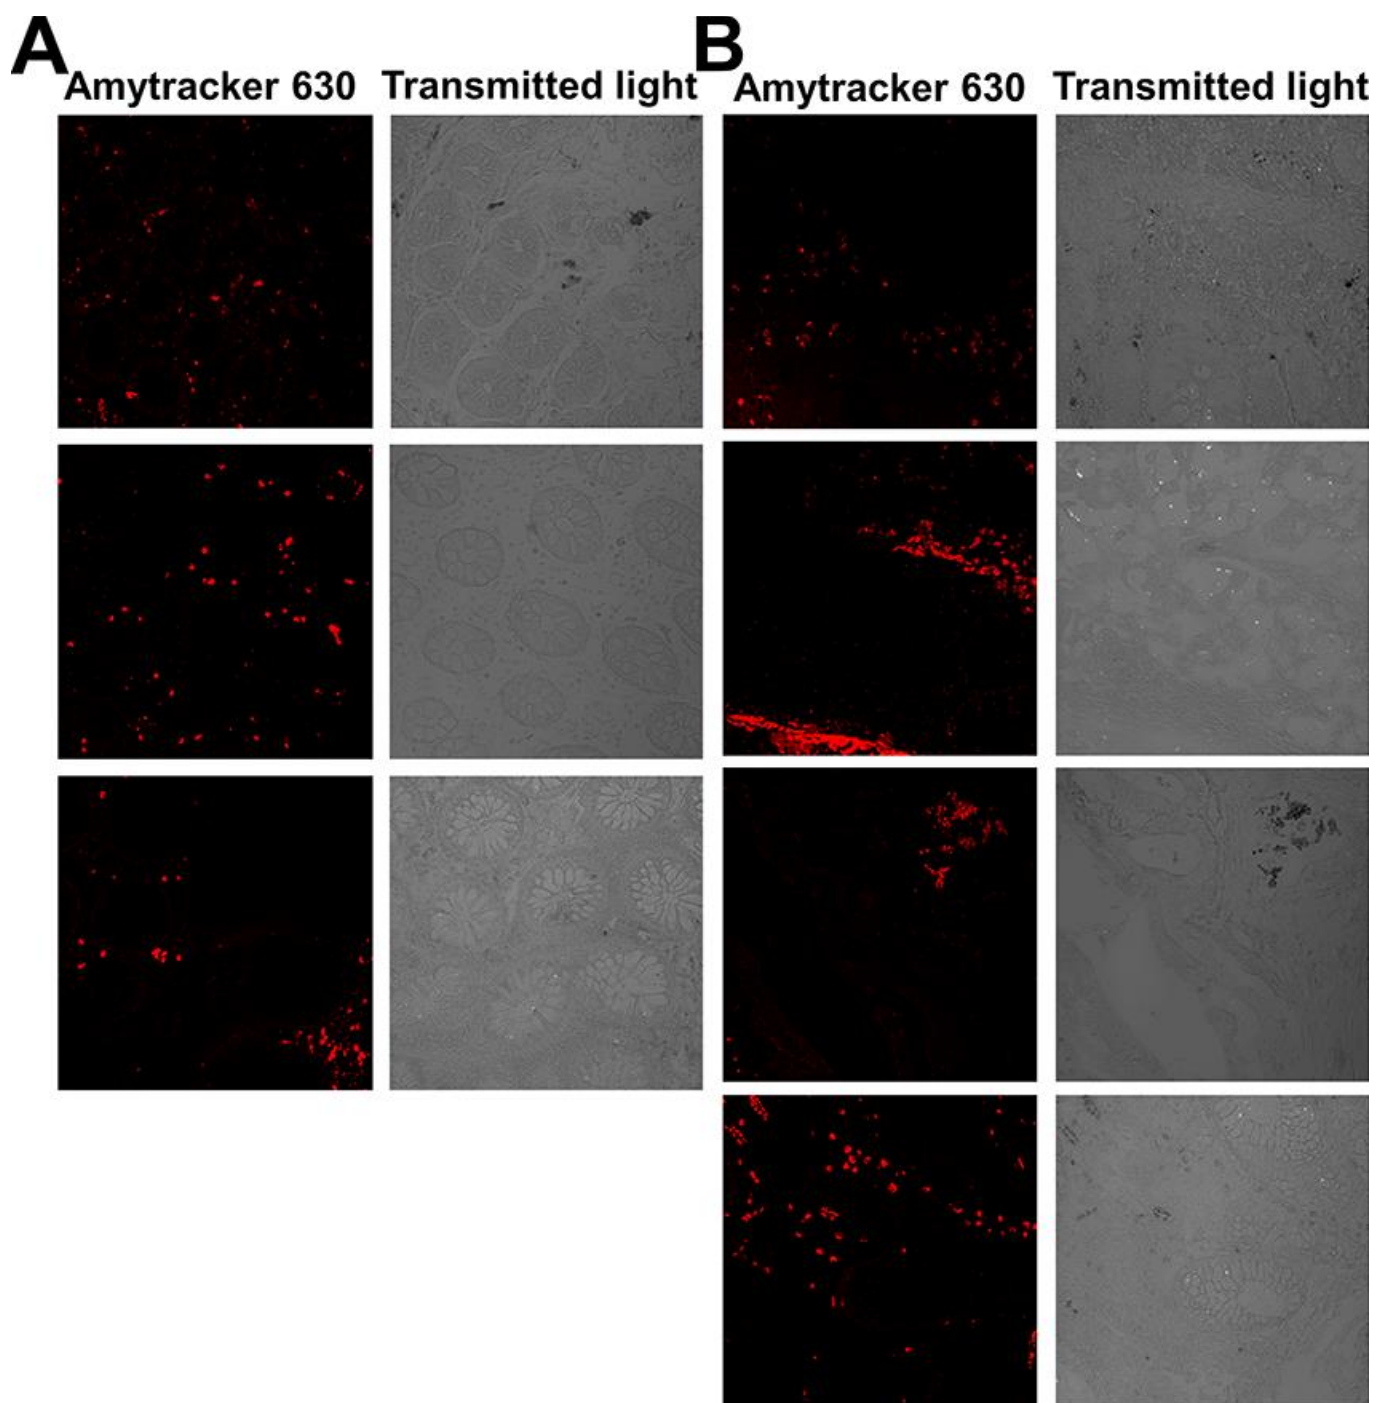

**Supplementary Figure S13.** Confocal micrographs of **a)** healthy colorectal tissues and **b)** colorectal cancer (CRC) tumor tissues stained with the amyloid-selective Amytracker™ 630 marker, showing the amyloid-specific fluorescence signal, together with the corresponding transmitted light images. The brightness and contrast of the images were adjusted in Adobe Photoshop CS6.



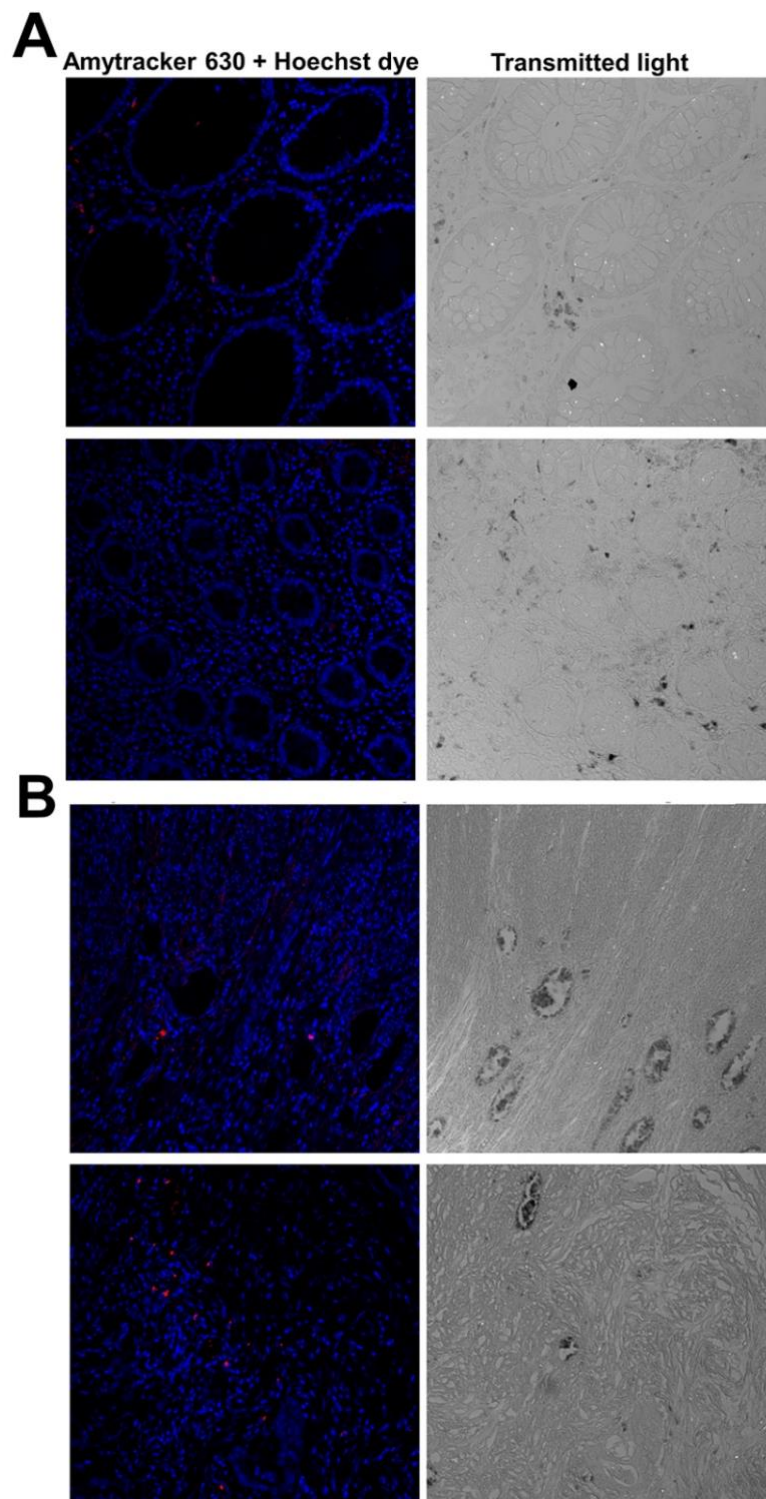

**Supplementary Figure S14.** Confocal micrographs of **a)** healthy colorectal tissues and **b)** colorectal cancer (CRC) tumor tissues stained with the amyloid-selective Amytracker™ 630 marker and Hoechst fluorescent dye, showing the amyloid-specific fluorescence signal overlaid on the Hoechst fluorescence signal, together with the corresponding transmitted light images. The brightness and contrast of the images were adjusted in Adobe Photoshop CS6.



### ***Supplementary Tables***

**Supplementary Table S1.** Automated tissue processing protocol.

| Step | Solution        | Time              | Temperature |
|------|-----------------|-------------------|-------------|
| 1    | 10% Formalin    | 2.5 hours         | RT          |
| 2    | Ethanol (70%)   | 45 minutes        | RT          |
| 3    | Ethanol (96%)   | 45 minutes        | RT          |
| 4    | Ethanol (96%)   | 50 minutes        | RT          |
| 5    | Ethanol (99.9%) | 50 minutes        | RT          |
| 6    | Ethanol (99.9%) | 1 hour            | RT          |
| 7    | Ethanol (99.9%) | 1 hour            | RT          |
| 8    | Xylene          | 50 minutes        | RT          |
| 9    | Xylene          | 1 hour            | RT          |
| 10   | Paraffin        | 45 minutes        | 60°C        |
| 11   | Paraffin        | 1 hour            | 60°C        |
| 12   | Paraffin        | 1 hour 20 minutes | 60°C        |

**Supplementary Table S2.** Automated haematoxylin and eosin (H&E) staining protocol.

| Step | Solution      | Time      | Repetitions |
|------|---------------|-----------|-------------|
| 1    | Xylene        | 5 minutes | X2          |
| 2    | Ethanol (99%) | 2 minutes | X2          |



|    |                        |            |    |
|----|------------------------|------------|----|
| 3  | Ethanol (96%)          | 2 minutes  | X2 |
| 4  | Ethanol (70%)          | 2 minutes  | X1 |
| 5  | Tap water              | 2 minutes  | X1 |
| 6  | Mayers<br>Haematoxylin | 8 minutes  | X1 |
| 7  | Running water          | 5 minutes  | X1 |
| 8  | Scott water            | 15 seconds | X1 |
| 9  | 0.1% Eosin             | 4 minutes  | X1 |
| 10 | Running water          | 1 minute   | X1 |
| 11 | Ethanol (70%)          | 30 seconds | X1 |
| 12 | Ethanol (96%)          | 30 seconds | X2 |
| 13 | Ethanol (99%)          | 30 seconds | X2 |
| 14 | Xylene                 | 1 minute   | X2 |

**Supplementary Table S3.** Dehydration protocol.

| Step | Solution      | Time       | Repetitions |
|------|---------------|------------|-------------|
| 1    | Ethanol (70%) | 30 seconds | X1          |
| 2    | Ethanol (96%) | 30 seconds | X2          |
| 3    | Ethanol (99%) | 30 seconds | X2          |
| 4    | Xylene        | 1 minute   | X2          |



**Supplementary Table S4.** Deparaffinisation protocol.

| Step | Solution      | Time       | Repetitions |
|------|---------------|------------|-------------|
| 1    | Oven (60°C)   | 15 minutes | X1          |
| 2    | Xylene        | 5 minutes  | X2          |
| 3    | Ethanol (99%) | 5 minutes  | X2          |
| 4    | Ethanol (96%) | 5 minutes  | X2          |
| 5    | Ethanol (70%) | 5 minutes  | X1          |
| 6    | Tap water     | 5 minutes  | X1          |
